# Supplementary material for: Comparison of exosomes derived from induced pluripotent stem cells and mesenchymal stem cells as therapeutic nanoparticles for treatment of corneal epithelial defects
Source: publisher site journal article supplement (doi:10.18632/aging.103904), 2020-10-13
Supplement: Supplementary file [file aging-v12i19-103904-supplementary-material-SD1.pdf]

## SUPPLEMENTARY FIGURE

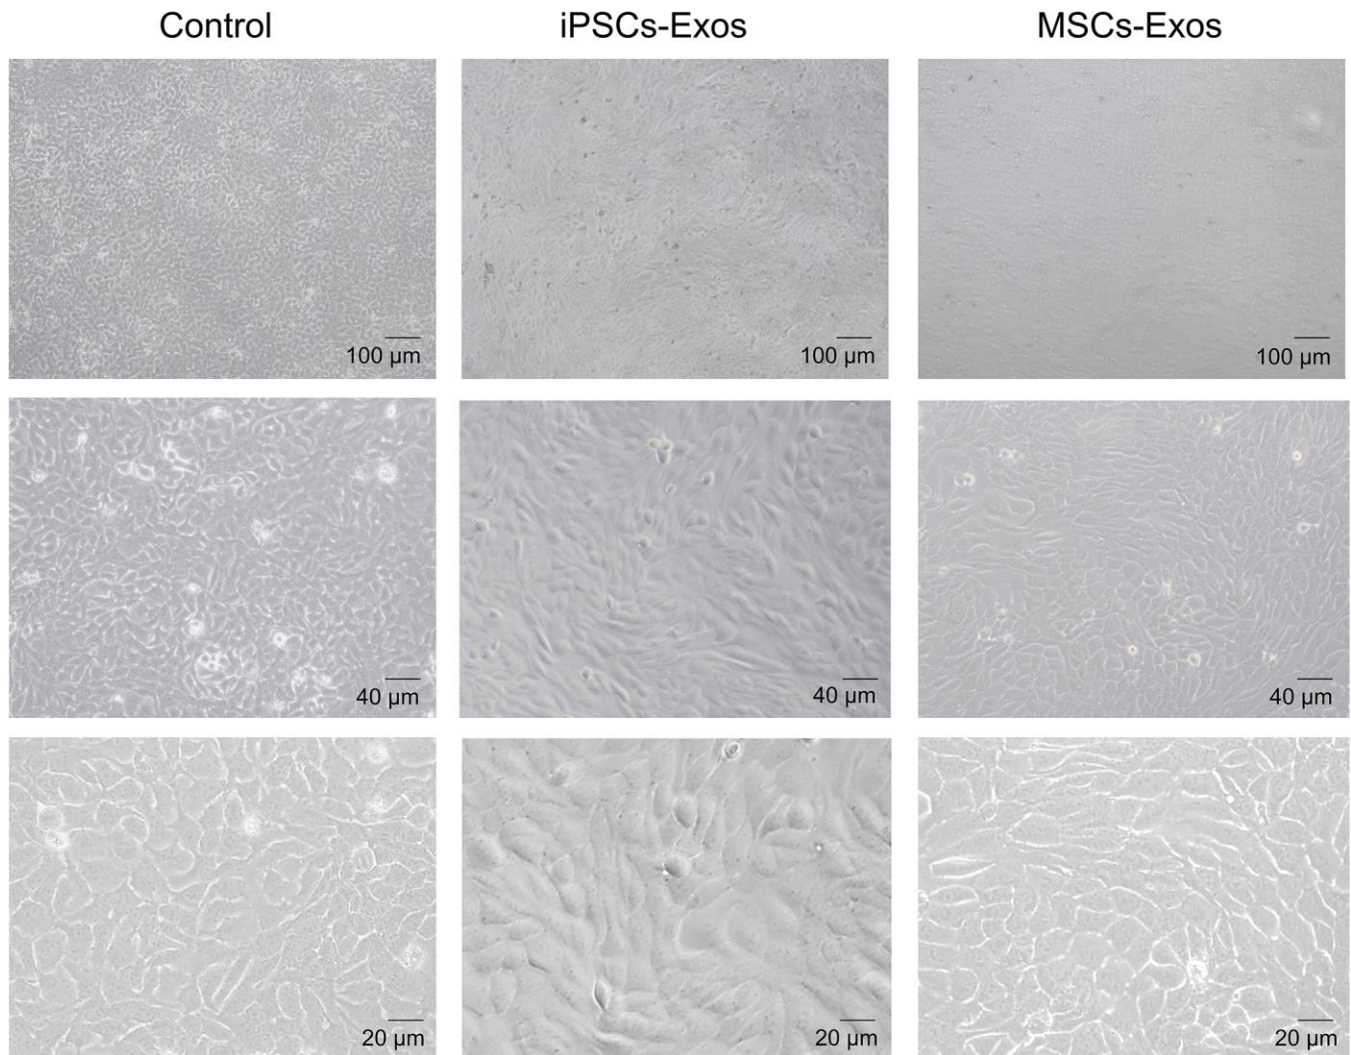

**Supplementary Figure 1. Cell morphology of HCECs.** After HCECs were stimulated with iPSCs/MSCs-Exos or vehicle for 48 h, cell morphology was taken by microscope. HCECs in control group showed atrophy and increased apoptotic cells, while those with iPSCs/MSCs-Exos showed a much fuller rounded shape.
